# Supplementary material for: Fruit load induces changes in global gene expression and in abscisic acid (ABA) and indole acetic acid (IAA) homeostasis in citrus buds
Source: PubMed Central journal article supplement (PMC4071824; doi:10.1093/jxb/eru148), 2014-04-04
Supplement: supp_eru148_jexbot114504_file002.pdf [file supp_eru148_jexbot114504_file002.pdf]

**Fruit Load Induces Changes In Global Gene Expression And In ABA And IAA Homeostasis in Citrus Buds.** Liron Shalom, Sivan Samuels, Naftali Zur, Lyudmila Shlizerman, Adi Faigenboim, Eduardo Blumwald and Avi Sadka

**SUPPLEMENTARY DATA**

**Table S1.** List of primers used in this study

| gene name                  | primers sequences          |                    |
|----------------------------|----------------------------|--------------------|
| <i>β ACTIN</i>             | GTCTGGTCCATCCATTGTCCA      | Forward Primer     |
|                            | CAATGGCCCCAACCTTAGC        | Reverse Primer     |
| <i>CiFT2</i>               | CAACAAAATTCATCACTTGAATAGTC | Forward Primer     |
|                            | AAACTCAACAACACTTAGCACAAA   | Reverse Primer     |
|                            | AGGCTGTGTGTGCGTGTA         | dual-labeled probe |
| <i>CiLFY</i>               | AATGCCCAACCAAGGTGACTA      | Forward Primer     |
|                            | AAAGCCCTCCTCAGTCATTC       | Reverse Primer     |
| <i>CiSPL5</i>              | CCTGTTGTGATTGTTGCTGGTC     | Forward Primer     |
|                            | CTCCGACGCCTCTCATTGT        | Reverse Primer     |
| <i>RbcS</i>                | CACCAACTGGCTTGAAGAAG       | Forward Primer     |
|                            | CACCCATCCTTTCTCCAAC        | Reverse Primer     |
| <i>LHCB3</i>               | CCAAGTACACAATGGGAAATGA     | Forward Primer     |
|                            | ATCAGCAGACAAACCAGCAG       | Reverse Primer     |
| <i>PRK</i>                 | GCCATGAGGTCTCGATTTTG       | Forward Primer     |
|                            | CTTCAACATTTGCTGGGTGA       | Reverse Primer     |
| <i>PSB28</i>               | TTGCTGCTGCTACTGATGTTT      | Forward Primer     |
|                            | CACGGATTCTCTCTCTCAG        | Reverse Primer     |
| <i>PSAD</i>                | CAAACAAAGGAGATTGGCTTC      | Forward Primer     |
|                            | ACCAGTACCTGAATCCTGAGC      | Reverse Primer     |
| <i>SHM</i>                 | CGCCATGATGTTGAGGAGTAT      | Forward Primer     |
|                            | CCTCGTCGCCTCTGTGTAATA      | Reverse Primer     |
| <i>Fd</i>                  | CTGGGGGAGAGGAAGAAATC       | Forward Primer     |
|                            | GGTCAACGGTCCAGACACA        | Reverse Primer     |
| <i>NCED3-like</i>          | TGGCTACATTCCTCGCTTTTG      | Forward Primer     |
|                            | GCTCCAGAGTCATTGCGTTA       | Reverse Primer     |
| <i>CAX3-like</i>           | CAGAGCACTGCGAACATGG        | Forward Primer     |
|                            | TCAATGTACCACAGGGTCCTC      | Reverse Primer     |
| <i>PBPI-like1</i>          | GATTGTACTIONCAGTCGCCATTCC  | Forward Primer     |
|                            | CTCTCTCATTGTCTGGTTTTTGG    | Reverse Primer     |
| <i>NPH3-like</i>           | TGGAAAATGAACTGGATGGA       | Forward Primer     |
|                            | CCTCTTTCACCTCCGACAAT       | Reverse Primer     |
| <i>PBPI-like2</i>          | GCAAATAGTGGGGTTGTGTTT      | Forward Primer     |
|                            | CTCATCCATTAGCAAACGAAAC     | Reverse Primer     |
| <i>Ca-binding EF-hand1</i> | GCTTGGAGGAACTCAACTGG       | Forward Primer     |
|                            | GCAGCAGCATTGGGATTATT       | Reverse Primer     |

**Table S2.** List of genes used to design probes for nCounter analysis (Shalom *et al.*, 2012)

| <b>Gene</b>                                           | <b>Gene name</b> |
|-------------------------------------------------------|------------------|
| Trehalose phosphate synthase (TPS)                    | Ciclev10018842   |
| Trehalose phosphate phosphatase (TPP)                 | Ciclev10005151   |
| UDP-glucose:flavonoid-3-O-glucosyltransferase (UF3GT) | Ciclev10004868   |
| 4-coumarate:coenzyme A ligase (4CL)                   | Ciclev10019532   |
| Chalcone synthase (CHS)                               | Ciclev10015535   |
| Chalconeisomerase (CHI)                               | Ciclev10032749   |
| Cinnamate 4-hydroxylase (C4H)                         | Ciclev10008125   |
| $\beta$ Actin                                         | Ciclev10025866   |
| Polyubiquitin 2                                       | Ciclev10013001   |
| Cyclophilin                                           | Ciclev10029291   |

**Table S3.** Statistical data of deep sequencing analysis

| <b>Sample ID</b>                                    | <b>Avg. Yield (Mb)</b> | <b>Avg. # Reads</b> | <b>Avg. # Transcripts</b> | <b>GO Annotated</b> |
|-----------------------------------------------------|------------------------|---------------------|---------------------------|---------------------|
| ON Time 0                                           | 2120.5                 | 20,993,674          | 12495                     | 9715                |
| OFF Time 0                                          | 1,896                  | 18,767,601          | 12680                     | 9762                |
| ON Time 1                                           | 2,246                  | 22,239,857          | 12444                     | 9688                |
| DEFTime 1                                           | 2,103                  | 20,820,325          | 12532                     | 9750                |
| ON Time 2                                           | 2,235                  | 22,132,161          | 12349                     | 9591                |
| DEFTime 2                                           | 2,125                  | 21,040,717          | 12412                     | 9610                |
| ON Time 4                                           | 2,224                  | 22,023,764          | 12456                     | 9684                |
| DEFTime 4                                           | 2,486                  | 24,614,145          | 12482                     | 9681                |
| OFF Time 4                                          | 3,189                  | 31,578,496          | 12724                     | 9891                |
| <b>Total number of transcripts in all libraries</b> |                        |                     | <b>14,400</b>             | <b>11,445</b>       |

**Table S4.** GO<sup>1</sup> categorization of unique genes up- or down-regulated in buds of OFF-Crop and de-fruited (DEF) trees relative to buds of ON-Crop trees during Time 4.

| General process                  | GO term         | Description                                        | Query item | Ref item | p-value  | FDR      | Enrichment fold <sup>2</sup> |
|----------------------------------|-----------------|----------------------------------------------------|------------|----------|----------|----------|------------------------------|
| <b>OFF-Crop up-regulated</b>     |                 |                                                    |            |          |          |          |                              |
| Glucan/Starch                    | GO:0019252      | starch biosynthetic process                        | 15         | 51       | 1.00E-06 | 0.00083  | 4.33                         |
|                                  | GO:0005982      | starch metabolic process                           | 16         | 61       | 2.40E-06 | 0.00099  | 3.86                         |
|                                  | GO:0009311      | oligosaccharide metabolic process                  | 16         | 66       | 7.30E-06 | 0.002    | 3.57                         |
|                                  | GO:0006073      | cellular glucan metabolic process                  | 22         | 146      | 0.00041  | 0.041    | 2.22                         |
|                                  | GO:0044042      | glucan metabolic process                           | 23         | 158      | 0.00051  | 0.045    | 2.14                         |
| Carbohydrate metabolism          | GO:0016051      | carbohydrate biosynthetic process                  | 39         | 308      | 0.00019  | 0.022    | 1.86                         |
|                                  | GO:0000023      | maltose metabolic process                          | 12         | 36       | 2.80E-06 | 0.001    | 4.91                         |
|                                  | GO:0005984      | disaccharide metabolic process                     | 13         | 55       | 6.70E-05 | 0.011    | 3.48                         |
| Glucosinolate metabolism         | GO:0019761      | glucosinolate biosynthetic process                 | 14         | 65       | 0.00011  | 0.014    | 3.17                         |
|                                  | GO:0019757      | glycosinolate metabolic process                    | 14         | 69       | 0.00021  | 0.023    | 2.99                         |
|                                  | GO:0019758      | glycosinolate biosynthetic process                 | 14         | 65       | 0.00011  | 0.014    | 3.17                         |
|                                  | GO:0019760      | glucosinolate metabolic process                    | 14         | 69       | 0.00021  | 0.023    | 2.99                         |
| S-Glycoside metabolism           | GO:0016143      | S-glycoside metabolic process                      | 14         | 69       | 0.00021  | 0.023    | 2.99                         |
|                                  | GO:0016144      | S-glycoside biosynthetic process                   | 14         | 65       | 0.00011  | 0.014    | 3.17                         |
|                                  | GO:0016138      | glycoside biosynthetic process                     | 14         | 75       | 0.00051  | 0.045    | 2.75                         |
| Various                          | GO:0030104      | water homeostasis                                  | 5          | 8        | 6.90E-05 | 0.011    | 9.20                         |
|                                  | GO:0006790      | sulfur metabolic process                           | 27         | 196      | 0.00044  | 0.042    | 2.03                         |
| <b>DEF up-regulated</b>          |                 |                                                    |            |          |          |          |                              |
| Endopeptidase/hydrolase activity | GO:0010951      | negative regulation of endopeptidase activity      | 6          | 9        | 5.90E-06 | 0.001    | 10.13                        |
|                                  | GO:0052548      | regulation of endopeptidase activity               | 6          | 10       | 1.40E-05 | 0.0021   | 9.12                         |
|                                  | GO:0051346      | negative regulation of hydrolase activity          | 8          | 18       | 8.80E-06 | 0.0014   | 6.75                         |
|                                  | GO:0010466      | negative regulation of peptidase activity          | 8          | 18       | 8.80E-06 | 0.0014   | 6.75                         |
|                                  | GO:0052547      | regulation of peptidase activity                   | 8          | 19       | 1.40E-05 | 0.0021   | 6.40                         |
| dephosphorylation                | GO:0035304      | regulation of protein amino acid dephosphorylation | 7          | 20       | 0.0002   | 0.016    | 5.32                         |
|                                  | GO:0035303      | regulation of dephosphorylation                    | 7          | 22       | 0.00039  | 0.024    | 4.83                         |
| Salicylic acid synthesis         | GO:0009697      | salicylic acid biosynthetic process                | 8          | 29       | 0.00044  | 0.027    | 4.19                         |
|                                  | GO:0009696      | salicylic acid metabolic process                   | 10         | 42       | 0.00033  | 0.023    | 3.62                         |
| NAD/NADPH metabolism             | GO:0006769      | nicotinamide metabolic process                     | 14         | 70       | 0.00018  | 0.015    | 3.04                         |
|                                  | GO:0046496      | nicotinamide nucleotide metabolic process          | 14         | 70       | 0.00018  | 0.015    | 3.04                         |
|                                  | GO:0006739      | NADP metabolic process                             | 14         | 66       | 9.10E-05 | 0.0094   | 3.22                         |
|                                  | GO:0006740      | NADPH regeneration                                 | 14         | 66       | 9.10E-05 | 0.0094   | 3.22                         |
| Oxidative stress                 | GO:0006979      | response to oxidative stress                       | 30         | 235      | 0.00049  | 0.029    | 1.94                         |
|                                  | GO:0042542      | response to hydrogen peroxide                      | 15         | 86       | 0.0005   | 0.03     | 2.65                         |
| biotic stimulus                  | GO:0051707      | response to other organism                         | 59         | 544      | 0.0002   | 0.016    | 1.65                         |
|                                  | GO:0009607      | response to biotic stimulus                        | 63         | 621      | 0.00073  | 0.04     | 1.54                         |
|                                  | GO:0009620      | response to fungus                                 | 25         | 179      | 0.00036  | 0.023    | 2.12                         |
|                                  | GO:0042742      | defense response to bacterium                      | 28         | 219      | 0.00072  | 0.04     | 1.94                         |
| abiotic stimulus                 | GO:0009628      | response to abiotic stimulus                       | 106        | 898      | 3.00E-08 | 1.20E-05 |                              |
|                                  | GO:0009651      | response to salt stress                            | 35         | 292      | 0.00059  | 0.034    | 1.82                         |
|                                  | GO:0009266      | response to temperature stimulus                   | 36         | 285      | 0.00019  | 0.016    | 1.92                         |
| endogenous stimulus              | GO:0071495      | cellular response to endogenous stimulus           | 29         | 226      | 0.00055  | 0.032    | 1.95                         |
|                                  | GO:0009719      | response to endogenous stimulus                    | 59         | 508      | 3.20E-05 | 0.0041   | 1.76                         |
| Various                          | GO:0009725      | response to hormone stimulus                       | 54         | 466      | 6.90E-05 | 0.0078   | 1.76                         |
|                                  | GO:0042221      | response to chemical stimulus                      | 130        | 1345     | 3.40E-05 | 0.0042   | 1.47                         |
|                                  | GO:0070887      | cellular response to chemical stimulus             | 45         | 366      | 6.50E-05 | 0.0076   | 1.87                         |
|                                  | GO:0006733      | oxidoreduction coenzyme metabolic process          | 14         | 82       | 0.00095  | 0.049    | 2.59                         |
|                                  | GO:0055114      | oxidation reduction                                | 121        | 1344     | 0.00079  | 0.042    | 1.37                         |
|                                  | GO:0018298      | protein-chromophore linkage                        | 5          | 10       | 0.00024  | 0.019    | 7.60                         |
|                                  | GO:0022900      | electron transport chain                           | 20         | 98       | 6.10E-06 | 0.001    | 3.10                         |
|                                  | GO:0019362      | pyridine nucleotide metabolic process              | 14         | 70       | 0.00018  | 0.015    | 3.04                         |
|                                  | GO:0043603      | cellular amide metabolic process                   | 14         | 74       | 0.00032  | 0.023    | 2.87                         |
|                                  | GO:0006091      | generation of precursor metabolites and energy     | 43         | 252      | 1.70E-08 | 8.90E-06 | 2.59                         |
|                                  | GO:0048878      | chemical homeostasis                               | 18         | 111      | 0.00038  | 0.023    | 2.46                         |
| GO:0006869                       | lipid transport | 13                                                 | 66         | 0.00035  | 0.023    | 2.99     |                              |

|                                     |            |                                                      |    |     |          |         |      |
|-------------------------------------|------------|------------------------------------------------------|----|-----|----------|---------|------|
|                                     | GO:0009820 | alkaloid metabolic process                           | 15 | 71  | 5.50E-05 | 0.0065  | 3.21 |
|                                     | GO:0010033 | response to organic substance                        | 86 | 767 | 3.30E-06 | 0.00066 | 1.70 |
| <b>DEF down-regulated</b>           |            |                                                      |    |     |          |         |      |
| <b>biotic stimulus</b>              | GO:0050832 | defense response to fungus                           | 19 | 123 | 9.90E-05 | 0.018   | 2.67 |
|                                     | GO:0051707 | response to other organism                           | 57 | 544 | 2.50E-05 | 0.0071  | 1.81 |
|                                     | GO:0009620 | response to fungus                                   | 25 | 179 | 5.20E-05 | 0.013   | 2.41 |
|                                     | GO:0009607 | response to biotic stimulus                          | 61 | 621 | 8.40E-05 | 0.016   | 1.70 |
| <b>amine/amino acid metabolism</b>  | GO:0006575 | cellular amino acid derivative metabolic process     | 37 | 285 | 6.20E-06 | 0.003   | 2.24 |
|                                     | GO:0042398 | cellular amino acid derivative biosynthetic process  | 31 | 208 | 1.90E-06 | 0.0014  | 2.58 |
|                                     | GO:0006519 | cellular amino acid and derivative metabolic process | 55 | 481 | 2.80E-06 | 0.0016  | 1.98 |
|                                     | GO:0009308 | amine metabolic process                              | 39 | 364 | 0.00024  | 0.037   | 1.85 |
|                                     | GO:0009310 | amine catabolic process                              | 11 | 48  | 7.90E-05 | 0.016   | 3.96 |
| <b>aromatic compound metabolism</b> | GO:0006725 | cellular aromatic compound metabolic process         | 49 | 388 | 5.70E-07 | 0.00082 | 2.18 |
|                                     | GO:0019438 | aromatic compound biosynthetic process               | 31 | 246 | 5.60E-05 | 0.013   | 2.18 |
|                                     | GO:0010038 | response to metal ion                                | 40 | 354 | 6.80E-05 | 0.015   | 1.95 |

<sup>1</sup>Gene ontology

<sup>2</sup>Enrichment fold was calculated based on GO-annotated genes (777, 753, 821, 662 in OFF-Crop up-regulated, DEF up-regulated, OFF-Crop down-regulated, DEF down-regulated, respectively) in the list of genes (959, 920, 997, 797 in OFF-Crop up-regulated, DEF up-regulated, OFF-Crop down-regulated, DEF down-regulated, respectively) per GO-annotated genes (11445) in the reference list (14400 genes).

**Table S5:** GO<sup>1</sup> categorization of genes of cluster 4 of DEF buds.

| General process                          | GO term    | Description                                    | Query item | Ref item | p-value  | FDR     | Enrichment fold <sup>2</sup> |
|------------------------------------------|------------|------------------------------------------------|------------|----------|----------|---------|------------------------------|
| <b>Light stimulus and photosynthesis</b> | GO:0009644 | response to high light intensity               | 10         | 70       | 4.90E-06 | 0.0016  | 6.29                         |
|                                          | GO:0009642 | response to light intensity                    | 11         | 88       | 6.40E-06 | 0.0016  | 5.50                         |
|                                          | GO:0009416 | response to light stimulus                     | 22         | 380      | 0.00011  | 0.011   | 2.55                         |
|                                          | GO:0009314 | response to radiation                          | 22         | 404      | 0.00026  | 0.024   | 2.40                         |
| <b>photosynthesis</b>                    | GO:0015979 | photosynthesis                                 | 12         | 128      | 4.70E-05 | 0.0076  | 4.13                         |
| <b>Respiratory burst</b>                 | GO:0002679 | respiratory burst during defense response      | 5          | 19       | 5.70E-05 | 0.0082  | 11.58                        |
|                                          | GO:0045730 | respiratory burst                              | 5          | 20       | 7.40E-05 | 0.0096  | 11.00                        |
| <b>Abiotic stimulus</b>                  | GO:0009612 | response to mechanical stimulus                | 5          | 21       | 9.60E-05 | 0.01    | 10.48                        |
|                                          | GO:0009266 | response to temperature stimulus               | 23         | 285      | 4.00E-07 | 0.00017 | 3.55                         |
|                                          | GO:0009408 | response to heat                               | 11         | 99       | 2.00E-05 | 0.0043  | 4.89                         |
|                                          | GO:0009628 | response to abiotic stimulus                   | 48         | 898      | 3.80E-07 | 0.00017 | 2.35                         |
| <b>Various</b>                           | GO:0001510 | RNA methylation                                | 8          | 62       | 8.90E-05 | 0.01    | 5.68                         |
|                                          | GO:0006457 | protein folding                                | 14         | 160      | 2.50E-05 | 0.0047  | 3.85                         |
|                                          | GO:0006412 | translation                                    | 30         | 360      | 4.50E-09 | 5.90E-  | 3.67                         |
|                                          | GO:0006091 | generation of precursor metabolites and energy | 16         | 252      | 0.00032  | 0.027   | 2.79                         |

<sup>1</sup>Gene ontology

<sup>2</sup>Enrichment fold was calculated based on GO-annotated genes (260) in the list of genes (351) per GO-annotated genes (11445) in the reference list (14400 genes).

**Table S6:** GO<sup>1</sup> categorization of up-regulated genes of OFF-Crop buds.

| General process              | GO term    | Description                       | Query item | Ref item | p-value  | FDR    | Enrichment fold <sup>2</sup> |
|------------------------------|------------|-----------------------------------|------------|----------|----------|--------|------------------------------|
| <b>Light stimulus</b>        | GO:0010218 | response to far red light         | 6          | 25       | 1.50E-06 | 0.0013 | 16.54                        |
|                              | GO:0010114 | response to red light             | 7          | 47       | 5.90E-06 | 0.0016 | 10.26                        |
|                              | GO:0009639 | response to red or far red light  | 9          | 140      | 0.00027  | 0.035  | 4.43                         |
| <b>photosynthesis</b>        | GO:0010207 | photosystem II assembly           | 5          | 36       | 0.00018  | 0.027  | 9.57                         |
| <b>carbohydrate stimulus</b> | GO:0009744 | response to sucrose stimulus      | 7          | 47       | 5.90E-06 | 0.0016 | 10.26                        |
|                              | GO:0034285 | response to disaccharide stimulus | 7          | 48       | 6.80E-06 | 0.0016 | 10.05                        |
|                              | GO:0009743 | response to carbohydrate stimulus | 11         | 178      | 8.70E-05 | 0.016  | 4.26                         |

<sup>1</sup>Gene ontology

<sup>2</sup>Enrichment fold was calculated based on GO-annotated genes (166) in the list of genes (215) per GO-annotated genes (11445) in the reference list (14400 genes).

**Table S7:** GO<sup>1</sup> categorization of down-regulated genes of OFF-Crop buds.

| General process           | GO term             | Description                                          | Query item | Ref item | p-value  | FDR     | Enrichment fold <sup>2</sup> |
|---------------------------|---------------------|------------------------------------------------------|------------|----------|----------|---------|------------------------------|
| Response to jasmonic acid | GO:0009867          | jasmonic acid mediated signaling pathway             | 6          | 43       | 0.00079  | 0.041   | 5.46                         |
|                           | GO:0071395          | cellular response to jasmonic acid stimulus          | 6          | 43       | 0.00079  | 0.041   | 5.46                         |
|                           | GO:0009753          | response to jasmonic acid stimulus                   | 14         | 111      | 1.30E-06 | 0.00052 | 4.94                         |
| Response to ethylene      | GO:0009873          | ethylene mediated signaling pathway                  | 6          | 37       | 0.00034  | 0.027   | 6.35                         |
|                           | GO:0009723          | response to ethylene stimulus                        | 11         | 97       | 4.60E-05 | 0.0066  | 4.44                         |
|                           | GO:0071369          | cellular response to ethylene stimulus               | 6          | 42       | 0.00069  | 0.04    | 5.59                         |
| Amino acid metabolism     | GO:0008652          | cellular amino acid biosynthetic process             | 11         | 138      | 0.00099  | 0.044   | 3.12                         |
|                           | GO:0006520          | cellular amino acid metabolic process                | 20         | 270      | 3.60E-05 | 0.0058  | 2.90                         |
|                           | GO:0042398          | cellular amino acid derivative biosynthetic process  | 15         | 208      | 0.0004   | 0.031   | 2.82                         |
|                           | GO:0006575          | cellular amino acid derivative metabolic process     | 19         | 285      | 0.00021  | 0.02    | 2.61                         |
|                           | GO:0006519          | cellular amino acid and derivative metabolic process | 32         | 481      | 2.60E-06 | 0.00084 | 2.60                         |
| Amine metabolism          | GO:0044106          | cellular amine metabolic process                     | 22         | 287      | 9.30E-06 | 0.0025  | 3.00                         |
|                           | GO:0009308          | amine metabolic process                              | 23         | 364      | 0.00012  | 0.013   | 2.47                         |
| Abiotic stress            | GO:0009611          | response to wounding                                 | 13         | 128      | 3.20E-05 | 0.0057  | 3.97                         |
|                           | GO:0009651          | response to salt stress                              | 18         | 292      | 0.00076  | 0.041   | 2.41                         |
|                           | GO:0006970          | response to osmotic stress                           | 19         | 321      | 0.0009   | 0.042   | 2.31                         |
| Response to metal ions    | GO:0046686          | response to cadmium ion                              | 18         | 290      | 0.0007   | 0.04    | 2.43                         |
|                           | GO:0010038          | response to metal ion                                | 21         | 354      | 0.0005   | 0.035   | 2.32                         |
| Endogenous stimulus       | GO:0071495          | cellular response to endogenous stimulus             | 17         | 226      | 0.00011  | 0.013   | 2.94                         |
|                           | GO:0009719          | response to endogenous stimulus                      | 36         | 508      | 1.60E-07 | 0.00013 | 2.77                         |
| Various                   | GO:0042221          | response to chemical stimulus                        | 72         | 1345     | 7.70E-08 | 0.00012 | 2.09                         |
|                           | GO:0009605          | response to external stimulus                        | 20         | 347      | 0.00093  | 0.042   | 2.25                         |
|                           | GO:0031407          | oxylipin metabolic process                           | 7          | 48       | 0.00022  | 0.02    | 5.71                         |
|                           | GO:0009737          | response to abscisic acid stimulus                   | 15         | 225      | 0.0009   | 0.042   | 2.61                         |
|                           | GO:0019438          | aromatic compound biosynthetic process               | 16         | 246      | 0.00081  | 0.041   | 2.54                         |
|                           | GO:0009725          | response to hormone stimulus                         | 29         | 466      | 2.40E-05 | 0.0048  | 2.43                         |
|                           | GO:0010033          | response to organic substance                        | 45         | 767      | 1.20E-06 | 0.00052 | 2.29                         |
|                           | GO:0044283          | small molecule biosynthetic process                  | 34         | 584      | 2.10E-05 | 0.0048  | 2.28                         |
|                           | GO:0019748          | secondary metabolic process                          | 27         | 467      | 0.00014  | 0.015   | 2.26                         |
|                           | GO:0034641          | cellular nitrogen compound metabolic process         | 26         | 453      | 0.00021  | 0.02    | 2.24                         |
|                           | GO:0010035          | response to inorganic substance                      | 26         | 462      | 0.00028  | 0.023   | 2.20                         |
|                           | GO:0043436          | oxoacid metabolic process                            | 32         | 642      | 0.00053  | 0.035   | 1.95                         |
|                           | GO:0019752          | carboxylic acid metabolic process                    | 32         | 642      | 0.00053  | 0.035   | 1.95                         |
|                           | GO:0006082          | organic acid metabolic process                       | 32         | 643      | 0.00054  | 0.035   | 1.94                         |
|                           | GO:0042180          | cellular ketone metabolic process                    | 32         | 650      | 0.00065  | 0.04    | 1.92                         |
| GO:0055114                | oxidation reduction | 61                                                   | 1344       | 6.10E-05 | 0.0082   | 1.77    |                              |

<sup>1</sup>Gene ontology

<sup>2</sup>Enrichment fold was calculated based on GO-annotated genes (292) in the list of genes (351) per GO-annotated genes (11445) in the reference list (14400 genes).

**Table S8:** GO<sup>1</sup> categorization of genes of cluster 3 of DEF buds.

| General process               | GO term                       | Description                                          | Query item | Ref item | p-value | FDR   | Enrichment fold <sup>2</sup> |
|-------------------------------|-------------------------------|------------------------------------------------------|------------|----------|---------|-------|------------------------------|
| root/root hair development    | GO:0048765                    | root hair cell differentiation                       | 5          | 79       | 0.00048 | 0.026 | 8.05                         |
|                               | GO:0048764                    | trichoblast maturation                               | 5          | 79       | 0.00048 | 0.026 | 8.05                         |
|                               | GO:0010054                    | trichoblast differentiation                          | 5          | 79       | 0.00048 | 0.026 | 8.05                         |
|                               | GO:0010053                    | root epidermal cell differentiation                  | 5          | 83       | 0.0006  | 0.026 | 7.66                         |
|                               | GO:0010015                    | root morphogenesis                                   | 5          | 100      | 0.0014  | 0.038 | 6.36                         |
|                               | GO:0022622                    | root system development                              | 7          | 175      | 0.00064 | 0.026 | 5.08                         |
| Floral development            | GO:0048364                    | root development                                     | 7          | 175      | 0.00064 | 0.026 | 5.08                         |
|                               | GO:0048437                    | floral organ development                             | 8          | 142      | 2.60E-  | 0.018 | 7.16                         |
|                               | GO:0048438                    | floral whorl development                             | 6          | 114      | 0.00036 | 0.026 | 6.69                         |
|                               | GO:0009908                    | flower development                                   | 8          | 273      | 0.002   | 0.046 | 3.72                         |
|                               | GO:0048608                    | reproductive structure development                   | 12         | 481      | 0.00081 | 0.028 | 3.17                         |
| Shoot development             | GO:0000003                    | reproduction                                         | 15         | 731      | 0.0015  | 0.039 | 2.61                         |
|                               | GO:0010016                    | shoot morphogenesis                                  | 6          | 143      | 0.0012  | 0.038 | 5.33                         |
|                               | GO:0048367                    | shoot development                                    | 7          | 197      | 0.0013  | 0.038 | 4.52                         |
| nucleotide metabolism         | GO:0022621                    | shoot system development                             | 7          | 199      | 0.0013  | 0.038 | 4.47                         |
|                               | GO:0009166                    | nucleotide catabolic process                         | 7          | 172      | 0.00058 | 0.026 | 5.17                         |
|                               | GO:0009207                    | purine ribonucleoside triphosphate catabolic process | 7          | 172      | 0.00058 | 0.026 | 5.17                         |
|                               | GO:0009203                    | ribonucleoside triphosphate catabolic process        | 7          | 172      | 0.00058 | 0.026 | 5.17                         |
|                               | GO:0009143                    | nucleoside triphosphate catabolic process            | 7          | 172      | 0.00058 | 0.026 | 5.17                         |
|                               | GO:0009146                    | purine nucleoside triphosphate catabolic process     | 7          | 172      | 0.00058 | 0.026 | 5.17                         |
|                               | GO:0006195                    | purine nucleotide catabolic process                  | 7          | 172      | 0.00058 | 0.026 | 5.17                         |
|                               | GO:0009154                    | purine ribonucleotide catabolic process              | 7          | 172      | 0.00058 | 0.026 | 5.17                         |
|                               | GO:0009261                    | ribonucleotide catabolic process                     | 7          | 172      | 0.00058 | 0.026 | 5.17                         |
|                               | GO:0009199                    | ribonucleoside triphosphate metabolic process        | 7          | 217      | 0.0022  | 0.046 | 4.10                         |
|                               | GO:0009205                    | purine ribonucleoside triphosphate metabolic process | 7          | 217      | 0.0022  | 0.046 | 4.10                         |
|                               | GO:0009144                    | purine nucleoside triphosphate metabolic process     | 7          | 217      | 0.0022  | 0.046 | 4.10                         |
| Chromatin organization        | GO:0009141                    | nucleoside triphosphate metabolic process            | 7          | 221      | 0.0024  | 0.05  | 4.03                         |
|                               | GO:0009259                    | ribonucleotide metabolic process                     | 8          | 261      | 0.0015  | 0.04  | 3.90                         |
|                               | GO:0016569                    | covalent chromatin modification                      | 7          | 151      | 0.00027 | 0.026 | 5.89                         |
|                               | GO:0016568                    | chromatin modification                               | 7          | 168      | 0.00051 | 0.026 | 5.30                         |
|                               | GO:0016570                    | histone modification                                 | 6          | 144      | 0.0012  | 0.038 | 5.30                         |
| morphogenesis and development | GO:0006325                    | chromatin organization                               | 7          | 209      | 0.0018  | 0.045 | 4.26                         |
|                               | GO:0051276                    | chromosome organization                              | 8          | 270      | 0.0019  | 0.046 | 3.77                         |
|                               | GO:0048646                    | anatomical structure formation involved in           | 5          | 87       | 0.00074 | 0.027 | 7.31                         |
|                               | GO:0048569                    | post-embryonic organ development                     | 8          | 145      | 3.00E-  | 0.018 | 7.01                         |
|                               | GO:0021700                    | developmental maturation                             | 5          | 93       | 0.001   | 0.033 | 6.83                         |
|                               | GO:0009887                    | organ morphogenesis                                  | 7          | 147      | 0.00023 | 0.026 | 6.05                         |
|                               | GO:0009793                    | embryonic development ending in seed dormancy        | 6          | 141      | 0.0011  | 0.036 | 5.41                         |
|                               | GO:0009888                    | tissue development                                   | 8          | 276      | 0.0022  | 0.046 | 3.68                         |
|                               | GO:0048513                    | organ development                                    | 15         | 563      | 0.00011 | 0.026 | 3.39                         |
|                               | GO:0048731                    | system development                                   | 15         | 566      | 0.00011 | 0.026 | 3.37                         |
| Heterocyte                    | GO:0009653                    | anatomical structure morphogenesis                   | 11         | 472      | 0.0021  | 0.046 | 2.96                         |
|                               | GO:0009791                    | post-embryonic development                           | 14         | 603      | 0.00066 | 0.026 | 2.95                         |
| ATP metabolism                | GO:0046700                    | heterocyte catabolic process                         | 7          | 216      | 0.0021  | 0.046 | 4.12                         |
|                               | GO:0046483                    | heterocyte metabolic process                         | 14         | 548      | 0.00026 | 0.026 | 3.25                         |
| Various                       | GO:0006200                    | ATP catabolic process                                | 6          | 114      | 0.00036 | 0.026 | 6.69                         |
|                               | GO:0046034                    | ATP metabolic process                                | 6          | 156      | 0.0018  | 0.046 | 4.89                         |
|                               | GO:0048469                    | cell maturation                                      | 5          | 80       | 0.00051 | 0.026 | 7.94                         |
|                               | GO:0009733                    | response to auxin stimulus                           | 6          | 131      | 0.00076 | 0.027 | 5.82                         |
|                               | GO:0009314                    | response to radiation                                | 13         | 404      | 4.60E-  | 0.018 | 4.09                         |
|                               | GO:0009266                    | response to temperature stimulus                     | 9          | 285      | 0.00067 | 0.026 | 4.01                         |
|                               | GO:0009416                    | response to light stimulus                           | 11         | 380      | 0.00039 | 0.026 | 3.68                         |
|                               | GO:0071310                    | cellular response to organic substance               | 9          | 314      | 0.0013  | 0.038 | 3.64                         |
|                               | GO:0006812                    | cation transport                                     | 9          | 333      | 0.0019  | 0.046 | 3.44                         |
|                               | GO:0051716                    | cellular response to stimulus                        | 16         | 750      | 0.00073 | 0.027 | 2.71                         |
| GO:0009628                    | response to abiotic stimulus  | 19                                                   | 898        | 0.0003   | 0.026   | 2.69  |                              |
| GO:0042221                    | response to chemical stimulus | 23                                                   | 1345       | 0.0014   | 0.038   | 2.17  |                              |

<sup>1</sup>Gene ontology

<sup>2</sup>Enrichment fold was calculated based on GO-annotated genes (90) in the list of genes (104) per GO-annotated genes (11445) in the reference list (14400 genes).

**Table S9:** GO<sup>1</sup> categorization of genes of cluster 2 of ON-Crop buds.

| General process | GO term    | Description        | Query item | Ref item | p-value  | FDR      | Enrichment fold <sup>2</sup> |
|-----------------|------------|--------------------|------------|----------|----------|----------|------------------------------|
| Lipid transport | GO:0006869 | lipid transport    | 10         | 66       | 6.10E-09 | 4.00E-06 | 13.33                        |
|                 | GO:0010876 | lipid localization | 10         | 84       | 6.50E-08 | 2.20E-05 | 10.48                        |
| Various         | GO:0009409 | response to cold   | 9          | 172      | 0.00022  | 0.036    | 4.60                         |
|                 | GO:0006412 | translation        | 15         | 360      | 3.60E-05 | 0.0079   | 3.67                         |

<sup>1</sup>Gene ontology

<sup>2</sup>Enrichment fold was calculated based on GO-annotated genes (130) in the list of genes (191) per GO-annotated genes (11445) in the reference list (14400 genes).

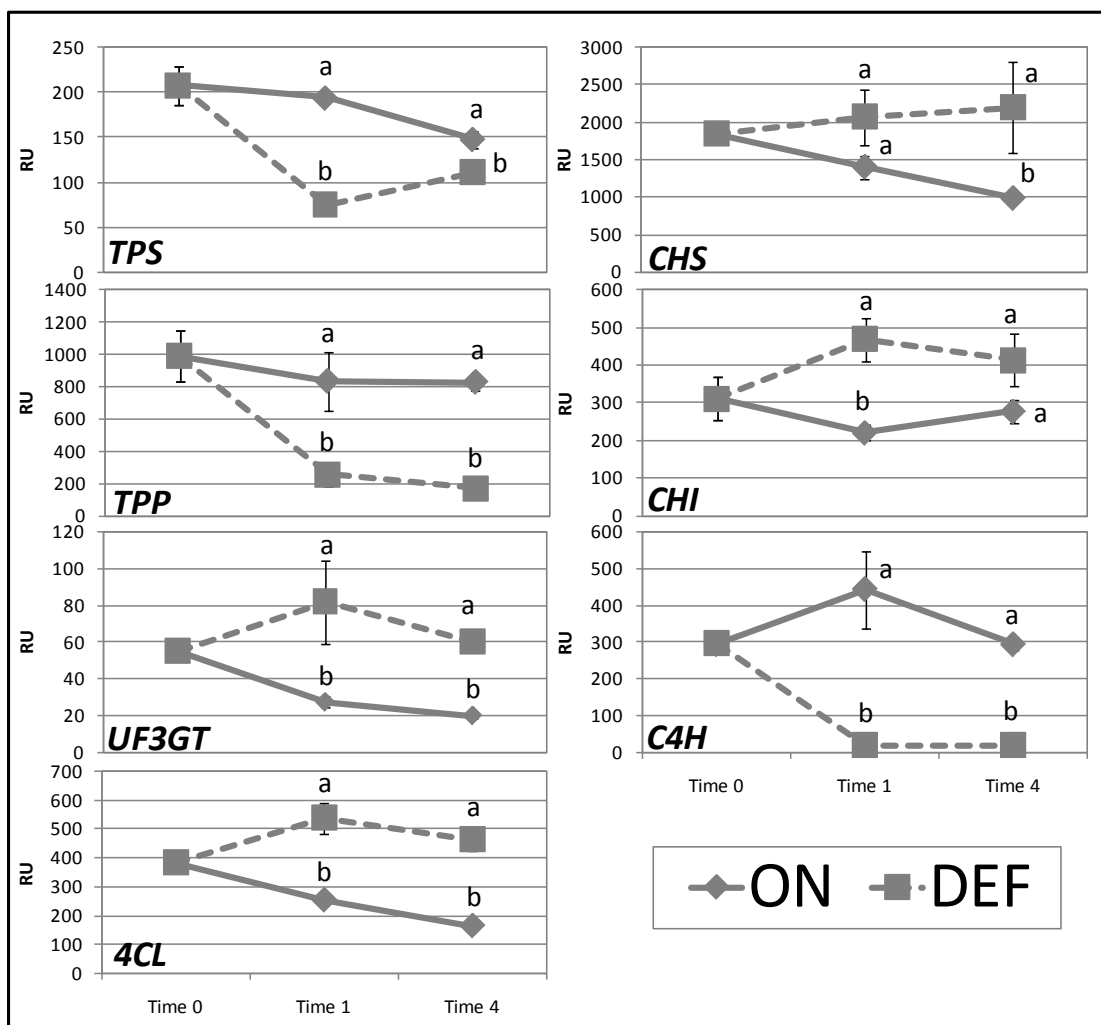

**Figure S1. De-fruiting alters the expression of trehalose and flavonoid metabolizing genes.** The mRNA levels of trehalose phosphate phosphatase (TPP), trehalose phosphate synthase (TPS), chalcone synthase (*CHS*), cinnamate 4-hydroxylase (*C4H*), 4-coumarate:coenzyme A ligase (*4CL*), chalconeisomerase (*CHI*), and UDP-glucose:flavonoid-3-O-glucosyltransferase (*UF3GT*) were measured in buds of ON-Crop (ON) and de-fruited trees at the indicated times following fruit removal by nCounter analyses. The numbers are mean values of three independent biological replicates  $\pm$  SE.

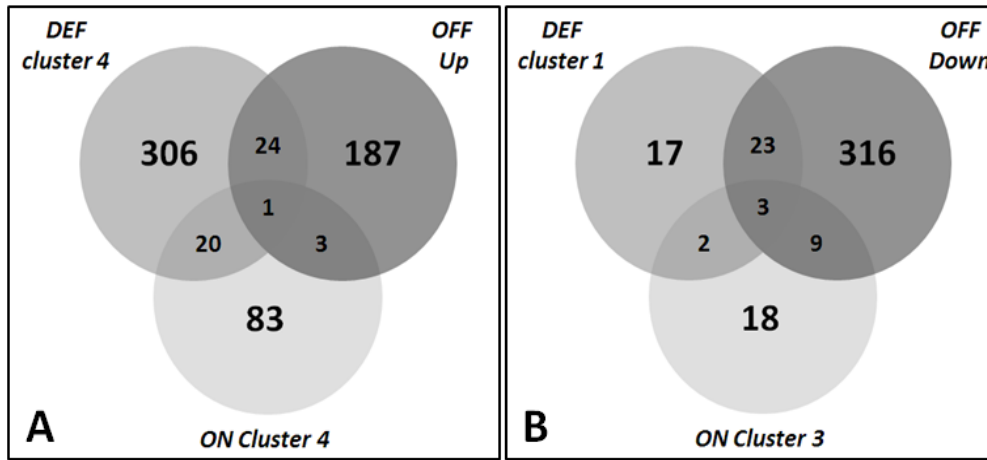

Figure S2. Venn diagrams of developmentally-regulated genes. Specific genes of the indicated clusters are listed in Supp. File 2.

### ON Time 4 vs. DEF Time 4

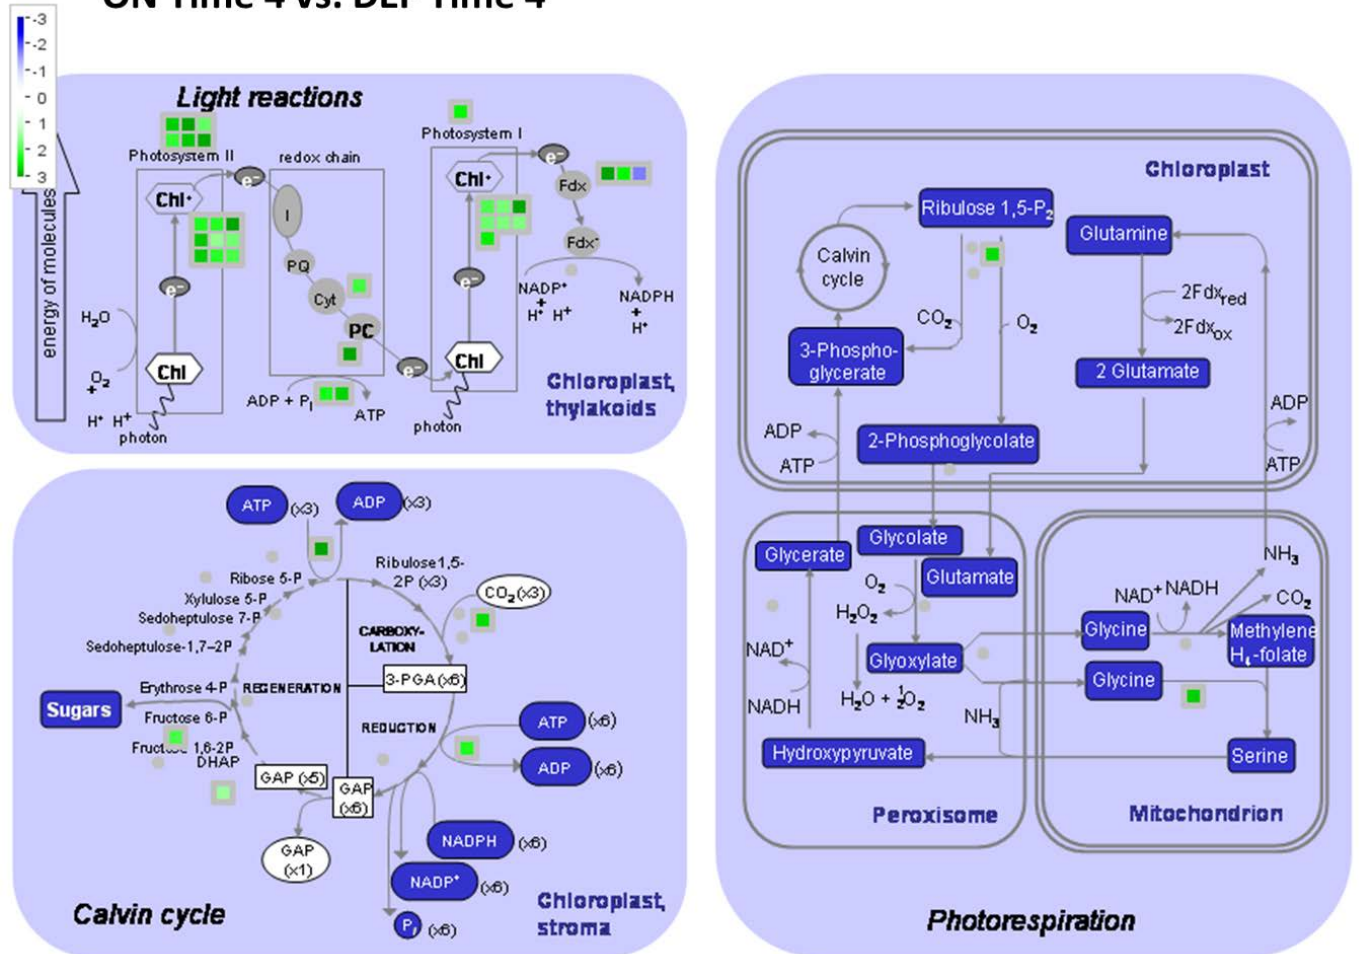

Figure S3. Photosynthetic genes are induced following de-fruited in the bud. Differentially expressed genes were analyzed by MapMan. Green squares represent genes reduced in buds of ON-Crop (ON) trees relative to buds of de-fruited (DEF) trees. A description of the specific genes and their fold change is provided in Supp. File 2 (under Fig. 5A).



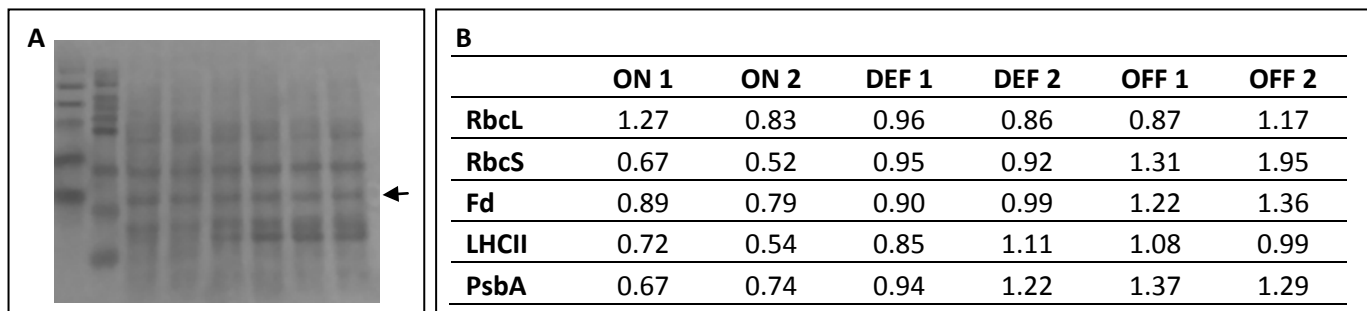

**Figure S4. Quantification of protein blot results (Fig. 5C).** Following electro-transfer, the protein blot was dyed with Ponceau S (A). Quantification of the protein signals following chemoilluminescence reaction (B) was carried on using the arrow-marked bend (A) as a standard.

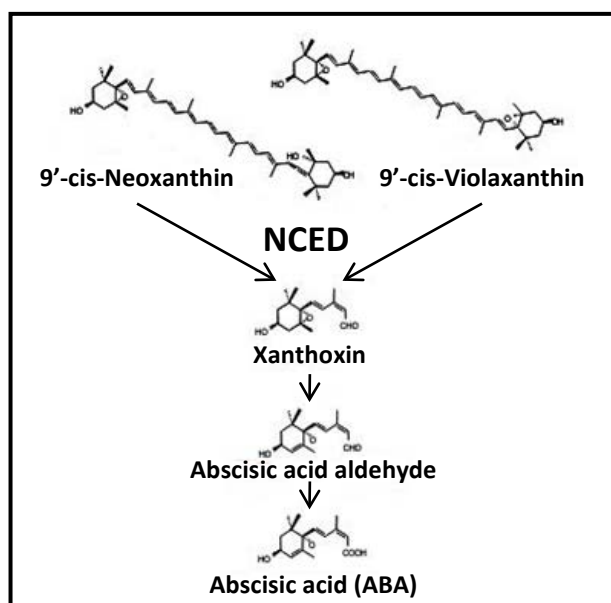

**Fig.S5.** Schematic representation of the cleavage of 9-cis xanthophylls to xanthoxin by 9-cis-epoxycarotenoid dioxygenase (NCED), a key regulated step in the biosynthesis of ABA in plants

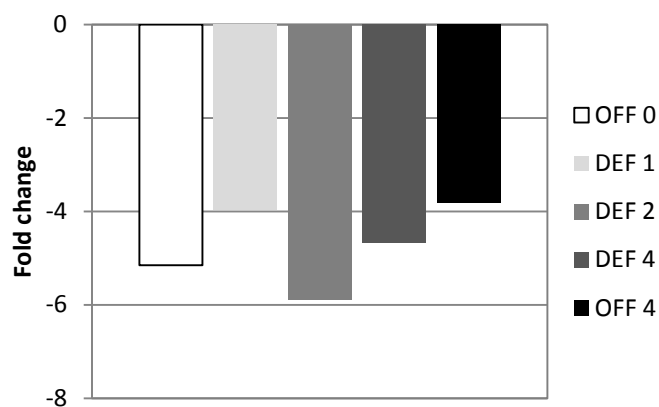

**Figure S6. Changes in the expression of PYRI-like gene.** Fold change in transcript levels of *Cs7g30500.1*, showing 84% homology (73% identity) to the *Arabidopsis* gene At2g38310 encoding a PYR protein, an ABA receptor component.

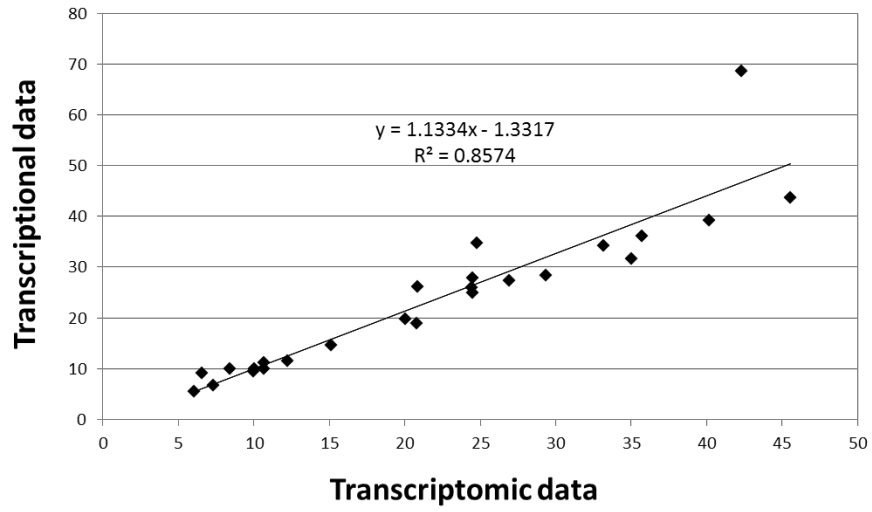

**Figure S7. Linear regression between transcriptomic and transcriptional (qPCR) data of Ca-related and NPH3-like genes.**
